# Supplementary material for: Probing the microenvironments in the grooves of Z-DNA using dan-modified oligonucleotides
Source: Royal Society of Chemistry journal article supplement (doi:10.1039/b600026f), 2006-01-01
Supplement: b600026f.pdf [file b600026f.pdf]

## Electronic Supplementary Information

### Probing the microenvironments in the grooves of Z-DNA using dan-modified oligonucleotides

Takumi Kimura, Kiyohiko Kawai and Tetsuro Majima\*

The Institute of Scientific and Industrial Research (SANKEN), Osaka University

Mihogaoka 8-1, Ibaraki, Osaka 567-0047, Japan

#### General methods

High performance liquid chromatography (HPLC) was performed on a JASCO Gulliver MD at 254 nm using a reversed phase Cosmosil MSII column ( $4.6 \times 150$  mm). Ultraviolet (UV) spectra were recorded with a JASCO V-530 spectrophotometer. Circular dichroism (CD) spectra were obtained on a JASCO CD-J720 spectrometer. Fluorescence spectra were measured on a Hitachi 850 spectrofluorometer.

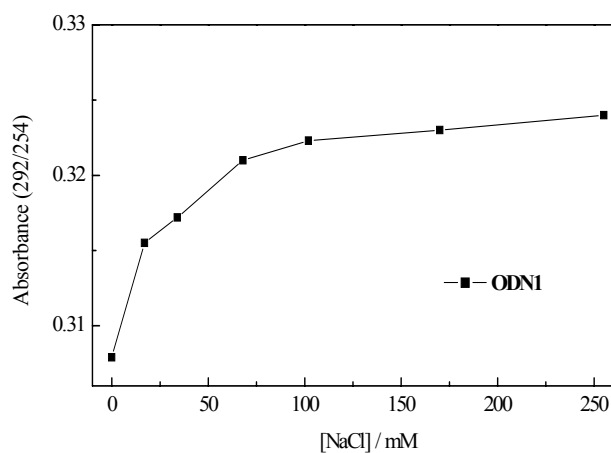

**Figure S1.** The B- to Z-DNA transition of ODN1 was monitored by UV titration. Absorbance 292/254 was plotted versus the concentration of sodium chloride.

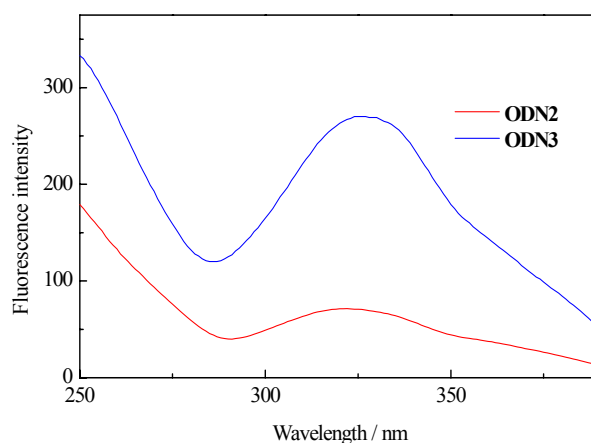

**Figure S2.** The excitation spectra of dan-modified ODNs (**ODN2** and **3**) were monitored at 460 nm.

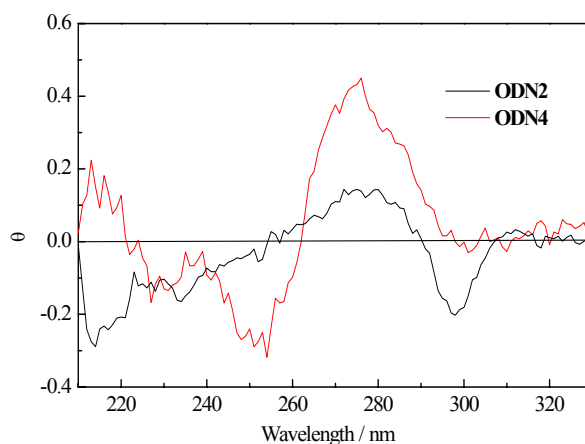

**Figure S3 A.** The CD spectra of <sup>dan</sup>C containing Z-DNA forming sequence (CAC<sup>dan</sup>CGCG) is hybridized with unmodified (**ODN4**) and <sup>Br</sup>G modified (**ODN2**) complementary strand.

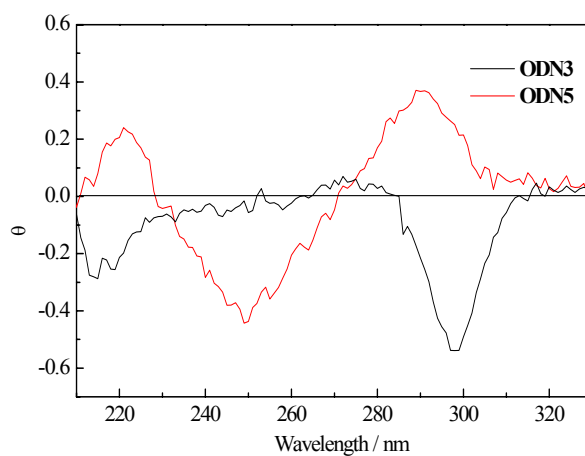

**Figure S3 B.** The CD spectra of <sup>dan</sup>G containing Z-DNA forming sequence (CAC<sup>dan</sup>GCGCG) is hybridized with unmodified (**ODN5**) and <sup>Br</sup>G modified (**ODN3**) complementary strand.
